# Supplementary material for: Comparative Analysis of Root Transcriptome of High-NUE Mutant and Wild-Type Barley under Low-Nitrogen Conditions
Source: MDPI journal article supplement (doi:10.3390/agronomy13030806), 2023-03-10
Supplement: s1 [file s1]

Table S1. List of the genes and primers selected for q-PCR validation

| Gene_id              | Description                                      | Sequences (5'-3')                                                           |
|----------------------|--------------------------------------------------|-----------------------------------------------------------------------------|
| HORVU1Hr1G0505<br>40 | nitrate transporter 1:2                          | GTCTGGAACGGCATACTGGA<br>TAGGTGAACATGTCGGCGAT                                |
| HORVU6Hr1G0055<br>90 | high affinity nitrate transporter 2.6            | CTGACCTTGGTGCCCCGTTAT<br>CGCAGATGGAGAAGAGGACC                               |
| HORVU1Hr1G0091<br>00 | Potassium transporter family protein             | ACCCAACCAACATAAGACCGA<br>TATCCATGCCCCCTCTAGCCA                              |
| HORVU3Hr1G0621<br>50 | NAC domain containing protein 2                  | CGAGGACTCTACGTCGTCTG<br>CCTAGGCTGGTGGAATCCTG                                |
| HORVU3Hr1G0660<br>50 | Transcription factor bHLH62                      | AAGGGAAGCTCGCTGGAAAA<br>CCAAGTTCTTTTCACCCTGCG                               |
| HORVU6Hr1G0338<br>40 | Zinc finger CCCH domain-containing protein<br>14 | TCCCCAAGGAAGAATGCCTG<br>TTGCATCCCTCTGCAGTGTT                                |
| HORVU1Hr1G0211<br>70 | Glutathione S-transferase family protein         | GCTGACTCTCTTCGAATCGC<br>TTCCTTGAGGCTGGATTCCC                                |
| HORVU3Hr1G0060<br>50 | Caffeic acid 3-O-methyltransferase 1             | TACCGCCTTCCTACAGCTTC<br>TTGGGTTCTTACAAGCCACG                                |
| HORVU3Hr1G1176<br>40 | 23 kDa jasmonate-induced protein                 | AAGGCTCTACCATGAACGCC<br>ATACACCGGAACGTCTTCGC                                |
| HORVU7Hr1G0470<br>00 | ATP-dependent 6-phosphofructokinase 3            | ACATGGCAAGCGTCGACTTA<br>TCCATCAGGAGGCTGGAAGA                                |
| HORVU0Hr1G0061<br>20 | E3 ubiquitin-protein ligase SINA-like 7          | GACGTTTCTCTGCCCAGTCA<br>ACGACTCGACTGGCTCTACA                                |
| HORVU4Hr1G0054<br>40 | germin-like protein 4                            | TCTAAAAACCTAGGGGCTGGC<br>GTCCTGTAGAGGGTCAGGGT                               |
| HvGAPDH              | glycolytic<br>dehydrogenase                      | glyceraldehyde-3-phosphate<br>AGATGCCCCCTATGTTTGTGG<br>GGTCTTCTGTGTGGCAGTGA |
| HvActin              | actin                                            | GCTGACCGTATGAGCAAGGA<br>GGAAAGTGCTGAGTGAGGCT                                |

Table S2 The DEGs encoding the others nutrient transporters identified in A9-29 compared with Hua30 under long-term LN stress

| id                    | fold change |      |      |       | description                                    |
|-----------------------|-------------|------|------|-------|------------------------------------------------|
|                       | 0d          | 7d   | 14d  | 21d   |                                                |
| Potassium transporter |             |      |      |       |                                                |
| HORVU1Hr1G009100      | 2.87        | 3.67 | 6.45 | 5.40  | Potassium transporter family protein           |
| HORVU2Hr1G064770      | 1.96        | 1.48 | 1.31 | 8.50  | Potassium transporter family protein           |
| HORVU3Hr1G013670      | inf         | inf  | inf  | 38.37 | Potassium transporter family protein           |
| HORVU6Hr1G073510      | 0.70        | 1.04 | 0.51 | 3.98  | Potassium transporter family protein           |
| HORVU2Hr1G100440      | 1.77        | 2.19 | 0.70 | 1.13  | high-affinity K+ transporter 1                 |
| HORVU2Hr1G082740      | 1.15        | 0.84 | 0.68 | 2.58  | Voltage-gated potassium channel subunit beta-2 |
| HORVU3Hr1G072850      | 0.96        | 1.07 | 2.41 | 0.82  | Potassium channel KAT3                         |
| HORVU7Hr1G040970      | 1.52        | 2.93 | 2.10 | 1.80  | Potassium channel SKOR                         |
| Zinc transporter      |             |      |      |       |                                                |
| HORVU1Hr1G070460      | 0.90        | 1.40 | 2.14 | 0.96  | Zinc transporter 5                             |
| HORVU2Hr1G112230      | 0.96        | 1.05 | 0.92 | 2.30  | Zinc transporter 8                             |
| HORVU4Hr1G082000      | 1.99        | 3.09 | 1.16 | 1.01  | Zinc transporter 2                             |
| HORVU7Hr1G097270      | 0.67        | 2.32 | 0.86 | 1.30  | Zinc transporter 7                             |
| Iron transporter      |             |      |      |       |                                                |
| HORVU2Hr1G101310      | 1.33        | 2.61 | 0    | 1.03  | Vacuolar iron transporter homolog 5            |
| HORVU4Hr1G031840      | 0.22        | 0.37 | 0.43 | 0.30  | vacuolar iron transporter 1                    |
| HORVU6Hr1G061000      | 2.12        | 1.67 | 2.22 | 3.51  | Vacuolar iron transporter homolog 1            |
| HORVU4Hr1G013220      | 1.53        | 1.05 | 0.97 | 2.24  | Divalent metal cation transporter MntH         |
| HORVU7Hr1G078330      | 0.22        | inf  | inf  | inf   | Divalent metal cation transporter MntH         |
| sugar transporter     |             |      |      |       |                                                |
| HORVU1Hr1G029920      | 8.75        | 1.98 | 1.11 | 1.40  | Bidirectional sugar transporter N3             |
| HORVU1Hr1G065100      | 2.48        | 2.67 | 1.33 | 1.35  | Bidirectional sugar transporter N3             |
| HORVU2Hr1G007130      | 2.87        | 2.62 | 2.62 | 2.09  | sugar transporter 6                            |
| HORVU2Hr1G079670      | 1.38        | 2.42 | 7.66 | 1.68  | sugar transporter protein 12                   |
| HORVU3Hr1G018740      | 15.51       | inf  | inf  | 13.90 | sugar transporter 1                            |
| HORVU3Hr1G112110      | 0.28        | 0.64 | 0.35 | 0.58  | sugar transporter 6                            |
| HORVU4Hr1G067450      | 1.59        | 2.23 | 0.50 | 2.12  | sugar transporter protein 7                    |
| HORVU7Hr1G019240      | 0.04        | 0.12 | 0.10 | 0.06  | sugar transporter 9                            |
| HORVU7Hr1G019280      | 0.11        | 1.02 | 0.43 | 0.24  | sugar transporter 1                            |
| Magnesium transporter |             |      |      |       |                                                |
| HORVU3Hr1G041850      | inf         | inf  | inf  | 15.55 | Magnesium transporter NIPA2                    |
| HORVU7Hr1G022700      | 0.08        | 0.09 | 0.09 | 0.06  | Magnesium transporter NIPA2                    |
| Boron transporter     |             |      |      |       |                                                |
| HORVU4Hr1G081330      | 1.29        | 0.66 | 0.24 | 0.31  | Boron transporter 4                            |

Bold font indicates a significant change in A9-29 vs Hua30 ( $P < 0.05$ ), the same as below.

Table S3 The DEGs encoding transcription factors (TFs) were identified in A9-29 compared with Hua30 under long-term LN stress

| id               | Fold change |             |             |              | description                                          |
|------------------|-------------|-------------|-------------|--------------|------------------------------------------------------|
|                  | 0d          | 7d          | 14d         | 21d          |                                                      |
| HORVU0Hr1G012740 | <b>2.05</b> | 1.28        | 1.18        | 1.05         | WRKY family transcription factor                     |
| HORVU0Hr1G012750 | <b>2.17</b> | 1.50        | 1.07        | 1.30         | WRKY family transcription factor                     |
| HORVU0Hr1G030830 | <b>0.41</b> | 0.59        | 0.95        | 1.05         | WRKY family transcription factor                     |
| HORVU1Hr1G090110 | 0.67        | <b>3.17</b> | 1.25        | 1.64         | WRKY family transcription factor                     |
| HORVU2Hr1G109330 | <b>0.49</b> | 0.65        | 1.35        | 1.08         | WRKY family transcription factor                     |
| HORVU3Hr1G058670 | 0.49        | 4.72        | 0.66        | <b>72.13</b> | WRKY family transcription factor                     |
| HORVU3Hr1G059220 | inf         | 1.22        | 1.83        | <b>2.79</b>  | WRKY family transcription factor                     |
| HORVU5Hr1G065420 | <b>0.28</b> | 0.75        | 0.59        | 1.15         | WRKY family transcription factor                     |
| HORVU1Hr1G081300 | 0.96        | 0.97        | 0.74        | <b>3.67</b>  | Heat stress transcription factor A-4d                |
| HORVU2Hr1G014590 | 0.73        | <b>0.35</b> | <b>0.25</b> | <b>0.39</b>  | Heat stress transcription factor A-2b                |
| HORVU2Hr1G095320 | 0.99        | 0.75        | <b>2.05</b> | 1.05         | Heat stress transcription factor B-2a                |
| HORVU5Hr1G068320 | 1.12        | <b>2.17</b> | 1.57        | <b>2.18</b>  | Heat stress transcription factor B-1                 |
| HORVU7Hr1G056820 | 0.66        | 0.65        | <b>2.18</b> | 1.05         | Heat stress transcription factor B-2b                |
| HORVU1Hr1G066390 | 1.16        | 1.80        | <b>2.85</b> | <b>2.21</b>  | GRAS family transcription factor                     |
| HORVU1Hr1G069140 | <b>2.16</b> | 1.31        | 1.07        | <b>2.33</b>  | GRAS family transcription factor                     |
| HORVU4Hr1G020490 | 1.08        | <b>2.56</b> | 1.05        | 1.86         | GRAS family transcription factor                     |
| HORVU4Hr1G061310 | <b>2.37</b> | 1.43        | 0.63        | 1.19         | GRAS family transcription factor                     |
| HORVU1Hr1G055710 | <b>2.25</b> | 1.12        | 1.40        | 0.56         | Ethylene-responsive transcription factor<br>2        |
| HORVU1Hr1G063100 | 0.72        | <b>3.05</b> | <b>0.43</b> | <b>2.37</b>  | Ethylene-responsive transcription factor<br>1        |
| HORVU1Hr1G064030 | 1.41        | <b>3.28</b> | 1.46        | <b>9.08</b>  | Ethylene-responsive transcription factor<br>1        |
| HORVU1Hr1G090250 | <b>3.49</b> | 1.64        | <b>0.44</b> | <b>2.54</b>  | Ethylene-responsive transcription factor<br>1        |
| HORVU2Hr1G094810 | 1.34        | 1.90        | 1.34        | <b>2.17</b>  | Ethylene-responsive transcription factor<br>1        |
| HORVU2Hr1G097850 | <b>2.58</b> | <b>2.05</b> | 1.32        | 1.30         | Ethylene-responsive transcription factor<br>1        |
| HORVU3Hr1G090740 | 1.41        | <b>2.10</b> | 0.83        | <b>3.87</b>  | Ethylene-responsive transcription factor<br>13       |
| HORVU4Hr1G000700 | 0.75        | 1.09        | 1.06        | <b>2.95</b>  | Ethylene-responsive transcription factor<br>1B       |
| HORVU4Hr1G013410 | 2.14        | <b>5.99</b> | 0.83        | 1.49         | Ethylene-responsive transcription factor<br>9        |
| HORVU4Hr1G052870 | 0.62        | 0.87        | 0.35        | <b>4.68</b>  | AP2-like ethylene-responsive<br>transcription factor |
| HORVU5Hr1G036590 | 1.51        | <b>2.56</b> | 0.51        | <b>3.62</b>  | Ethylene-responsive transcription factor<br>1        |
| HORVU5Hr1G068450 | <b>2.09</b> | <b>2.19</b> | 0.81        | <b>2.55</b>  | Ethylene-responsive transcription factor             |

|                  |               |              |              |              |                                                                 |
|------------------|---------------|--------------|--------------|--------------|-----------------------------------------------------------------|
|                  |               |              |              |              | 1                                                               |
| HORVU5Hr1G080790 | 1.72          | 1.55         | <b>2.25</b>  | <b>2.54</b>  | Ethylene-responsive transcription factor                        |
|                  |               |              |              |              | 1                                                               |
| HORVU6Hr1G062430 | <b>2.03</b>   | 1.80         | 0.89         | <b>2.22</b>  | Ethylene-responsive transcription factor                        |
|                  |               |              |              |              | 5                                                               |
| HORVU6Hr1G065430 | 1.41          | 1.45         | 0.98         | <b>2.54</b>  | Ethylene-responsive transcription factor                        |
|                  |               |              |              |              | 13                                                              |
| HORVU6Hr1G078520 | 1.94          | 1.73         | 0.64         | <b>2.16</b>  | Ethylene-responsive transcription factor                        |
|                  |               |              |              |              | 9                                                               |
| HORVU1Hr1G024280 | 0.98          | <b>2.21</b>  | 0.95         | 10.00        | Transcription factor bHLH51                                     |
| HORVU2Hr1G073240 | <b>0.01</b>   | <b>0.00</b>  | <b>0.04</b>  | <b>0.02</b>  | Transcription factor bHLH130                                    |
| HORVU3Hr1G005500 | <b>10.05</b>  | 7.09         | 7.11         | <b>3.15</b>  | Transcription factor bHLH35                                     |
| HORVU3Hr1G018680 | 0.57          | 1.09         | <b>2.05</b>  | 1.28         | Transcription factor bHLH51                                     |
| HORVU3Hr1G048770 | <b>0.47</b>   | 0.66         | 1.45         | <b>0.41</b>  | Transcription factor bHLH87                                     |
| HORVU3Hr1G066050 | <b>75.91</b>  | <b>36.03</b> | <b>34.35</b> | <b>21.28</b> | Transcription factor bHLH62                                     |
| HORVU3Hr1G066600 | 0.44          | 0.42         | <b>2.33</b>  | <b>3.53</b>  | Transcription factor bHLH87                                     |
| HORVU5Hr1G097520 | 0.46          | 1.06         | <b>0.40</b>  | 0.56         | Transcription factor bHLH85                                     |
| HORVU1Hr1G067680 | <b>inf</b>    | inf          | inf          | 3.81         | Basic-leucine zipper (bZIP) transcription factor family protein |
|                  |               |              |              |              | bZIP transcription factor 53                                    |
| HORVU4Hr1G053980 | 1.23          | 1.54         | 1.48         | <b>2.50</b>  | bZIP transcription factor family protein                        |
| HORVU5Hr1G030780 | <b>350.42</b> | <b>inf</b>   | <b>inf</b>   | <b>56.19</b> | bZIP transcription factor family protein                        |
| HORVU7Hr1G097370 | <b>0.34</b>   | 1.23         | 2.81         | 0.00         | Basic-leucine zipper (bZIP) transcription factor family protein |
|                  |               |              |              |              | factor family protein                                           |
| HORVU7Hr1G097390 | <b>0.26</b>   | 1.33         | 0.41         | 0.00         | Basic-leucine zipper (bZIP) transcription factor family protein |
|                  |               |              |              |              | factor family protein                                           |
| HORVU7Hr1G117010 | inf           | 3.70         | <b>3.24</b>  | 1.63         | Basic-leucine zipper (bZIP) transcription factor family protein |
|                  |               |              |              |              | factor family protein                                           |
| HORVU7Hr1G117020 | 1.87          | 1.68         | <b>2.34</b>  | 1.72         | Basic-leucine zipper (bZIP) transcription factor family protein |
|                  |               |              |              |              | factor family protein                                           |
| HORVU2Hr1G040400 | 0.79          | 0.42         | <b>0.23</b>  | 1.12         | B3 domain-containing transcription factor VAL3                  |
|                  |               |              |              |              | factor NGA2                                                     |
| HORVU3Hr1G010190 | 1.24          | 1.09         | <b>2.04</b>  | 1.65         | B3 domain-containing transcription factor NGA2                  |
|                  |               |              |              |              | factor NGA2                                                     |
| HORVU3Hr1G010260 | <b>0.04</b>   | <b>0.02</b>  | <b>0.00</b>  | 0.10         | AP2/B3 transcription factor family protein                      |
|                  |               |              |              |              | protein                                                         |
| HORVU3Hr1G064640 | <b>2.12</b>   | 1.80         | 0.86         | 2.00         | AP2/B3 transcription factor family protein                      |
|                  |               |              |              |              | protein                                                         |
| HORVU3Hr1G067350 | 3.49          | 1.82         | <b>6.89</b>  | <b>3.14</b>  | AP2/B3 transcription factor family protein                      |
|                  |               |              |              |              | protein                                                         |
| HORVU4Hr1G082090 | 1.52          | <b>2.62</b>  | 1.68         | <b>2.52</b>  | AP2/B3 transcription factor family protein                      |
|                  |               |              |              |              | protein                                                         |
| HORVU7Hr1G002230 | 0.73          | 0.96         | <b>0.41</b>  | 1.02         | AP2/B3 transcription factor family protein                      |
|                  |               |              |              |              | protein                                                         |
| HORVU6Hr1G081980 | <b>2.46</b>   | 1.97         | 0.89         | <b>2.31</b>  | AP2 domain transcription factor-like                            |

|                  |             |             |             |              |                                                                       |
|------------------|-------------|-------------|-------------|--------------|-----------------------------------------------------------------------|
| HORVU3Hr1G068900 | 1.14        | <b>2.09</b> | <b>2.13</b> | 1.50         | MADS-box transcription factor 32                                      |
| HORVU3Hr1G095090 | 0.91        | <b>2.33</b> | 0.91        | 1.62         | MADS-box transcription factor family protein                          |
| HORVU3Hr1G095200 | <b>2.07</b> | 0.96        | 1.78        | 1.12         | MADS-box transcription factor family protein                          |
| HORVU3Hr1G116800 | 1.45        | <b>0.00</b> | 0.24        | 0.00         | MADS-box transcription factor family protein                          |
| HORVU4Hr1G032440 | 1.02        | <b>0.49</b> | 0.95        | 1.13         | MADS-box transcription factor family protein                          |
| HORVU5Hr1G095630 | 0.94        | 0.54        | <b>0.19</b> | <b>0.37</b>  | MADS-box transcription factor 14                                      |
| HORVU7Hr1G023940 | 0.80        | 2.50        | <b>2.12</b> | <b>3.73</b>  | MADS-box transcription factor 25                                      |
| HORVU7Hr1G036130 | <b>3.45</b> | <b>2.56</b> | 1.52        | 1.24         | MADS-box transcription factor 55                                      |
| HORVU7Hr1G054390 | 4.38        | inf         | 6.59        | <b>7.95</b>  | MADS-box transcription factor family protein                          |
| HORVU7Hr1G082640 | <b>0.00</b> | <b>0.00</b> | <b>0.00</b> | <b>0.01</b>  | MADS transcription factor                                             |
| HORVU7Hr1G091210 | 3.27        | 0.99        | 1.71        | <b>22.04</b> | MADS-box transcription factor 16                                      |
| HORVU7Hr1G108280 | 1.64        | 1.37        | 1.03        | <b>2.40</b>  | MADS-box transcription factor 29                                      |
| HORVU3Hr1G010620 | 1.40        | <b>2.44</b> | <b>2.07</b> | 0.99         | myb-like transcription factor family protein                          |
| HORVU3Hr1G025030 | 1.95        | 1.21        | <b>0.48</b> | 1.20         | myb-like transcription factor family protein                          |
| HORVU6Hr1G019460 | <b>0.46</b> | 1.09        | 0.64        | 0.78         | myb-like transcription factor family protein                          |
| HORVU6Hr1G066000 | 0.56        | <b>5.09</b> | 0.98        | 2.02         | myb-like transcription factor family protein                          |
| HORVU5Hr1G086780 | <b>0.06</b> | <b>0.02</b> | <b>0.04</b> | <b>0.03</b>  | NAC transcription factor                                              |
| HORVU0Hr1G000710 | <b>2.11</b> | <b>2.03</b> | 1.84        | 1.93         | Transcription factor                                                  |
| HORVU0Hr1G010230 | 1.47        | 0.58        | 1.04        | <b>0.18</b>  | Nuclear transcription factor Y subunit A-                             |
| 7                |             |             |             |              |                                                                       |
| HORVU0Hr1G014200 | 1.35        | 1.34        | <b>3.02</b> | 1.27         | Orphans transcription factor                                          |
| HORVU0Hr1G029190 | 0.00        | 0.09        | <b>0.00</b> | 0.24         | global transcription factor group E8                                  |
| HORVU0Hr1G032230 | 0.62        | 1.59        | 1.54        | <b>2.11</b>  | transcription factor-related                                          |
| HORVU1Hr1G023170 | 0.00        | 3.77        | 0.95        | <b>3.15</b>  | Transcription factor jumonji (jmc) domain-containing protein          |
| HORVU1Hr1G065570 | <b>0.09</b> | <b>0.09</b> | <b>0.09</b> | <b>0.10</b>  | Transcription factor                                                  |
| HORVU1Hr1G073870 | 1.01        | 1.22        | 0.53        | <b>0.38</b>  | transcription factor-related                                          |
| HORVU1Hr1G091520 | 1.05        | <b>0.17</b> | 0.59        | 0.59         | Transcription factor RADIALIS                                         |
| HORVU2Hr1G046270 | 1.18        | 1.10        | <b>0.36</b> | 0.94         | Trihelix transcription factor GT-4                                    |
| HORVU2Hr1G114070 | <b>0.50</b> | 1.90        | 1.30        | 0.76         | Transcription factor ORG2                                             |
| HORVU3Hr1G018440 | 0.25        | <b>0.07</b> | 1.42        | 1.27         | Transcription factor IIB 60 kDa subunit                               |
| HORVU5Hr1G008340 | 0.54        | 0.53        | <b>0.44</b> | <b>0.40</b>  | TCP family transcription factor 4                                     |
| HORVU5Hr1G011780 | 0.74        | <b>2.08</b> | 0.58        | 1.01         | Transcription factor EB                                               |
| HORVU6Hr1G095070 | <b>0.16</b> | 0.21        | 0.61        | <b>0.23</b>  | sequence-specific DNA binding transcription factors;sequence-specific |

|                  |               |               |             |               | DNA binding                  |
|------------------|---------------|---------------|-------------|---------------|------------------------------|
| HORVU7Hr1G042170 | 1.38          | 0.62          | <b>2.24</b> | 1.40          | transcription factor-related |
| HORVU7Hr1G084240 | <b>2.18</b>   | 3.20          | 3.18        | 2.48          | Transcription factor HY5     |
| HORVU3Hr1G010200 | <b>0.06</b>   | 0.45          | 0.00        | 0.11          | auxin response factor 16     |
| HORVU3Hr1G022060 | <b>142.39</b> | <b>166.91</b> | <b>inf</b>  | <b>31.47</b>  | auxin response factor 6      |
| HORVU3Hr1G064590 | <b>inf</b>    | <b>inf</b>    | 11.04       | <b>inf</b>    | auxin response factor 20     |
| HORVU4Hr1G083690 | <b>0.01</b>   | <b>0.00</b>   | <b>0.00</b> | <b>0.03</b>   | auxin response factor 2      |
| HORVU5Hr1G026200 | <b>inf</b>    | <b>inf</b>    | <b>inf</b>  | <b>105.97</b> | auxin response factor 8      |
| HORVU5Hr1G103130 | <b>0.00</b>   | <b>0.00</b>   | <b>0.00</b> | <b>0.01</b>   | auxin response factor 2      |
| HORVU7Hr1G108360 | 0.50          | 0.86          | 0.65        | <b>0.39</b>   | auxin response factor 16     |

Table S4 The hormone signaling-related DEGs were identified in A9-29 compared with Hua30 under long-term LN stress

| id               | Fold change |             |             |             | description                                              |
|------------------|-------------|-------------|-------------|-------------|----------------------------------------------------------|
|                  | 0d          | 7d          | 14d         | 21d         |                                                          |
| HORVU2Hr1G034680 | 2.10        | 1.51        | 0.89        | <b>2.73</b> | Auxin-responsive GH3 family protein                      |
| HORVU2Hr1G088460 | 0.94        | 0.64        | 0.88        | <b>3.28</b> | Auxin-responsive GH3 family protein                      |
| HORVU2Hr1G110430 | 1.05        | 0.55        | 1.02        | <b>0.31</b> | SAUR-like auxin-responsive protein family                |
| HORVU2Hr1G122970 | <b>0.21</b> | <b>0.31</b> | 0.70        | 0.88        | Auxin-induced protein 5NG4                               |
| HORVU3Hr1G092460 | 0.47        | 1.80        | 1.16        | <b>2.28</b> | SAUR-like auxin-responsive protein family                |
| HORVU3Hr1G094000 | 0.83        | 0.79        | 0.69        | <b>0.50</b> | Auxin efflux carrier family protein                      |
| HORVU4Hr1G026680 | 0.95        | 1.12        | 1.10        | <b>2.03</b> | Auxin efflux carrier family protein                      |
| HORVU5Hr1G062510 | 1.72        | <b>2.89</b> | <b>3.65</b> | 1.36        | Dormancy/auxin associated family protein                 |
| HORVU5Hr1G076690 | 0.87        | 0.81        | 0.75        | <b>0.48</b> | SAUR-like auxin-responsive protein family                |
| HORVU5Hr1G086030 | <b>0.00</b> | <b>0.00</b> | <b>0.00</b> | 0.00        | Auxin induced protein                                    |
| HORVU5Hr1G087880 | <b>2.18</b> | 1.88        | 0.87        | <b>2.13</b> | Auxin efflux carrier family protein                      |
| HORVU7Hr1G057740 | 1.50        | 0.77        | <b>4.58</b> | 0.22        | SAUR-like auxin-responsive protein family                |
| HORVU7Hr1G091350 | 1.76        | 0.95        | <b>2.26</b> | 0.92        | SAUR-like auxin-responsive protein family                |
| HORVU7Hr1G107360 | 0.46        | 1.83        | 0.81        | <b>2.55</b> | SAUR-like auxin-responsive protein family                |
| HORVU3Hr1G066450 | 1.25        | 1.39        | <b>0.33</b> | 0.77        | IAA-amino acid hydrolase ILR1-like 2                     |
| HORVU5Hr1G027710 | <b>0.21</b> | <b>0.16</b> | <b>0.18</b> | <b>0.19</b> | IAA-amino acid hydrolase ILR1-like 7                     |
| HORVU5Hr1G055060 | 1.52        | <b>2.32</b> | 1.25        | 1.69        | IAA-amino acid hydrolase ILR1-like 9                     |
| HORVU1Hr1G066340 | 0.79        | 0.67        | 0.79        | <b>0.47</b> | putative indole-3-acetic acid-amido synthetase GH3.9     |
| HORVU1Hr1G074200 | <b>0.06</b> | <b>0.00</b> | <b>0.00</b> | <b>0.02</b> | Indole-3-acetaldehyde oxidase                            |
| HORVU5Hr1G052150 | 1.86        | <b>4.76</b> | <b>2.28</b> | <b>2.66</b> | Indole-3-glycerol phosphate synthase                     |
| HORVU5Hr1G123470 | 0.74        | <b>2.35</b> | 1.66        | 1.07        | Indole-3-acetaldehyde oxidase                            |
| HORVU7Hr1G114660 | 1.38        | <b>2.04</b> | 1.51        | <b>2.05</b> | Indole-3-glycerol phosphate synthase                     |
| HORVU7Hr1G117360 | <b>2.46</b> | <b>2.29</b> | <b>2.78</b> | 1.86        | Indole-3-acetaldehyde oxidase                            |
| HORVU2Hr1G034860 | <b>2.75</b> | 1.11        | 1.34        | 2.18        | Gibberellin-regulated family protein                     |
| HORVU2Hr1G090030 | 0.86        | 1.27        | 1.47        | <b>2.67</b> | Gibberellin 2-beta-dioxygenase 8                         |
| HORVU3Hr1G022840 | 1.03        | 0.78        | <b>2.45</b> | 1.30        | gibberellin 3-oxidase 1                                  |
| HORVU5Hr1G097030 | 0.64        | inf         | <b>5.29</b> | inf         | Gibberellin-regulated family protein                     |
| HORVU7Hr1G101720 | 0.00        | 0.63        | <b>0.37</b> | 1.01        | gibberellin 2-oxidase 6                                  |
| HORVU7Hr1G120380 | 0.77        | 0.79        | 0.69        | <b>0.29</b> | Gibberellin-regulated family protein                     |
| HORVU2Hr1G004620 | <b>0.20</b> | <b>0.45</b> | <b>0.36</b> | 0.60        | Copalyl diphosphate synthase 2                           |
| HORVU1Hr1G094290 | 1.06        | <b>2.05</b> | 0.62        | <b>2.25</b> | Cytokinin riboside 5'-monophosphate phosphoribohydrolase |

|                  |              |               |              |             |                                                             |
|------------------|--------------|---------------|--------------|-------------|-------------------------------------------------------------|
| HORVU3Hr1G019850 | <b>0.40</b>  | 0.73          | 0.77         | 1.24        | cytokinin oxidase/dehydrogenase 6                           |
| HORVU3Hr1G050770 | 1.18         | 1.55          | 0.80         | <b>3.02</b> | Cytokinin riboside 5'-monophosphate<br>phosphoribohydrolase |
| HORVU3Hr1G089250 | 1.12         | <b>2.24</b>   | 1.48         | 1.22        | Ethylene insensitive 3 family protein                       |
| HORVU5Hr1G080340 | <b>3.02</b>  | 2.47          | 0.70         | 1.10        | ethylene-responsive element binding<br>factor 13            |
| HORVU5Hr1G080350 | <b>2.23</b>  | 2.30          | 1.87         | 0.97        | Ethylene-responsive element binding<br>factor 14            |
| HORVU5Hr1G080430 | <b>3.28</b>  | 1.72          | 1.54         | 1.64        | ethylene-responsive element binding<br>factor 13            |
| HORVU3Hr1G047220 | <b>296.9</b> | <b>2346.9</b> | <b>493.2</b> | <b>66.5</b> | ABA-responsive protein                                      |
| HORVU5Hr1G006190 | 0.67         | 0.95          | <b>0.13</b>  | 1.43        | ABA-responsive protein, putative,<br>expressed              |



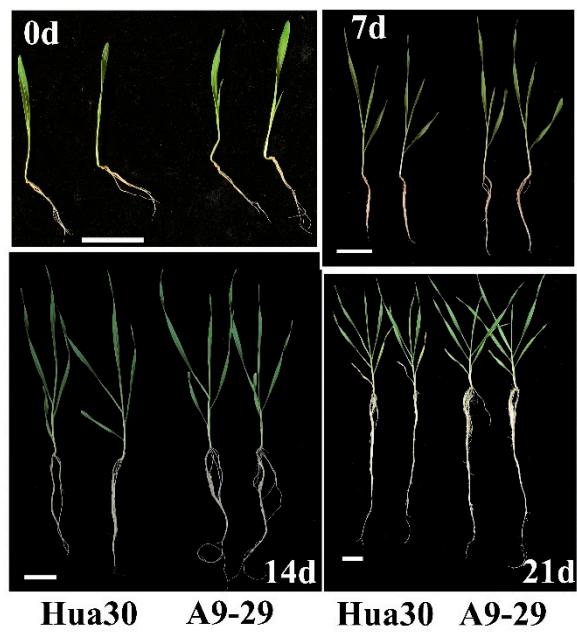

Figure S1. The root phenotypes of Hua 30 and A9-29 at different time points at low N condition.

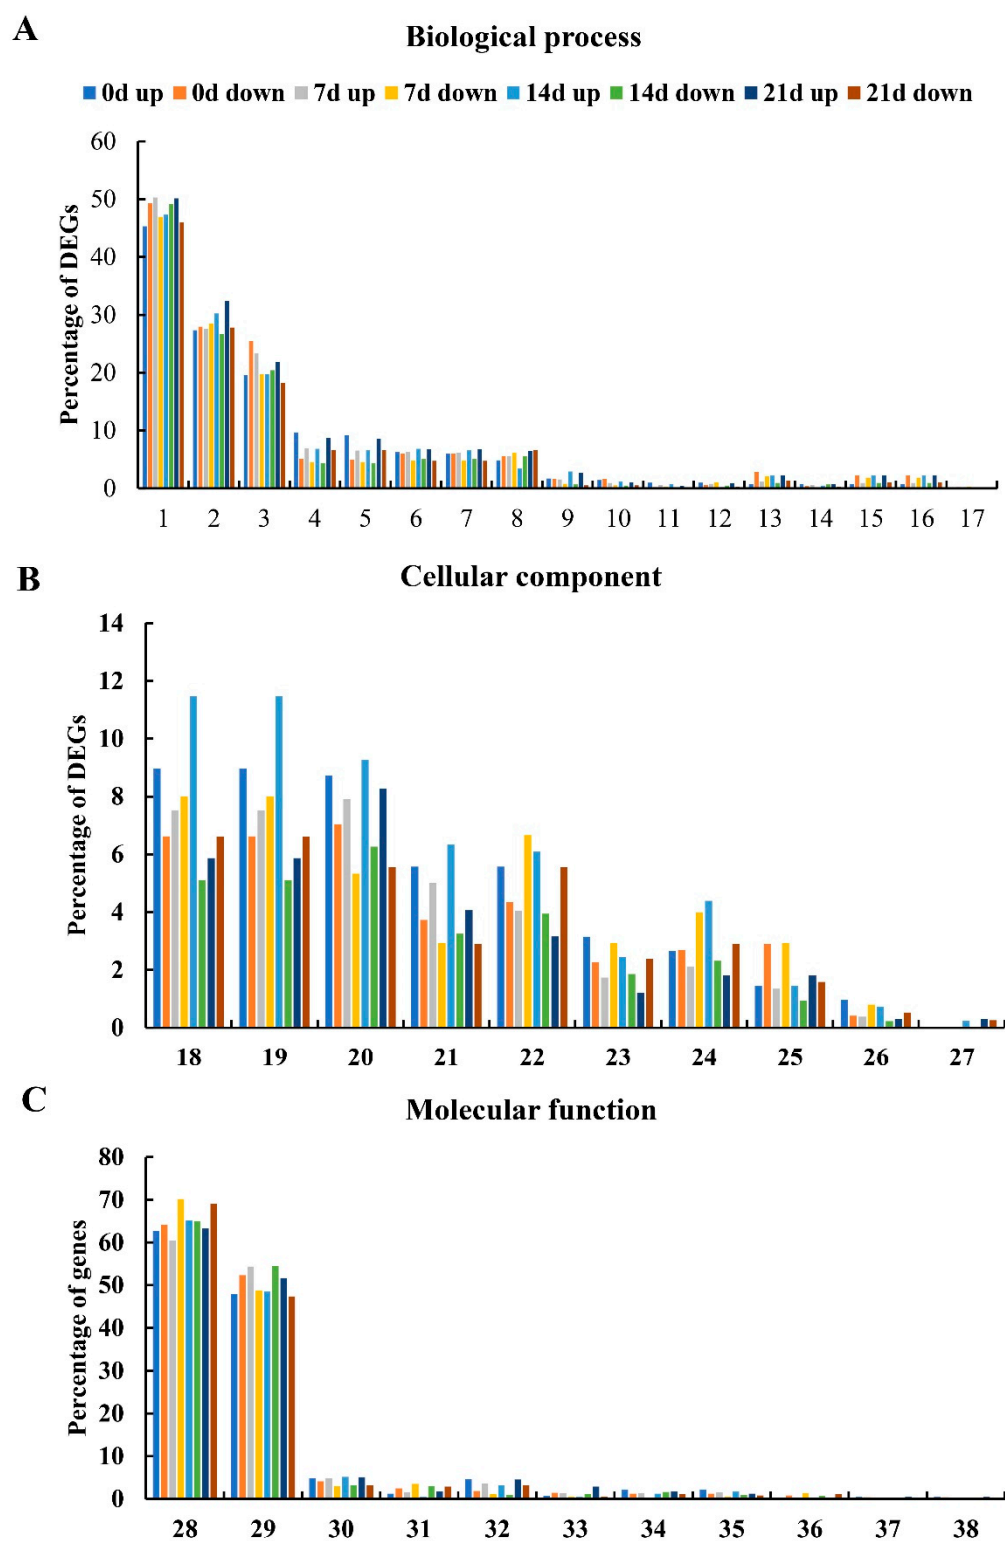

FigureS2 GO analysis of DEGs in each category. (A) Biological process. (B) Cellular component. (C) Molecular function. The number on X-axis indicates different GO terms as follows: 1-metabolic process; 2-cellular process; 3-single-organism process; 4-biological regulation; 5-regulation of biological process; 6-localization; 7-establishment of localization; 8-response to stimulus; 9-multicellular organismal process; 10-cellular component organization or biogenesis; 11-

developmental process; 12-signaling; 13-multi-organism process; 14-negative regulation of biological process; 15-reproduction; 16-reproductive process; 17-immune system process; 18-cell; 19-cell part; 20-membrane; 21-membrane part; 22-organelle; 23-organelle part; 24-macromolecular complex; 25-extracellular region; 26-membrane-enclosed lumen; 27-extracellular region part; 28-binding; 29-catalytic activity; 30-transporter activity; 31-antioxidant activity; 32-nucleic acid binding transcription factor activity; 33-nutrient reservoir activity; 34-electron carrier activity; 35-enzyme regulator activity; 36-structural molecule activity; 37-molecular transducer activity; 38-receptor activity. The *Y*-axis indicates the percentage of DEGs.
